# Supplementary material
Source: PubMed Central journal article supplement (PMC5364030)
Supplement: NIHMS837327-supplement-supplementary.pdf [file NIHMS837327-supplement-supplementary.pdf]

# Supplementary Materials: Probabilistic Modeling of Imaging, Genetics and Diagnosis

Nematollah K. Batmanghelich, Adrian Dalca, Gerald Quon, Mert Sabuncu, Polina Golland, for the Alzheimer's Disease Neuroimaging Initiative\*

## I. FURTHER EXPLANATION ABOUT THE EXPERIMENTS ON ADNI

Fig.1 shows the probability densities of the hyper-parameters used for the ADNI dataset.

List of the SNPs and the corresponding genes are provided in the Table I.

## II. VARIATIONAL BAYES TO APPROXIMATE THE POSTERIOR

The pseudo-code for our inference algorithm is shown in Algorithm 1, where  $\gamma$  is a  $M$ -dimensional vector of Bayes Factor computed as follows:

$$\log p(\mathbf{X}_{:m}|b_m; \mathbf{G}, \pi) = \sum_{n=1}^N \log \mathcal{N}(x_{nm}; 0, 1) + b_m \left( \log p(\mathbf{X}_{:m}|b_m = 1; \mathbf{G}, \pi) - \sum_{n=1}^N \log \mathcal{N}(x_{nm}; 0, 1) \right) \quad (1)$$

The computationally difficult term in the equation is the marginal likelihood,  $p(\mathbf{x}_m|b_m = 1; G, \pi)$ . Exact computation of the marginal likelihood is computationally intractable. However, it is common to approximate it with a lower bound of the variational energy [1]–[3]. We follow the variational mean-field method proposed by Carbonetto *et al.* [4] with a slight modification to approximate  $p(\mathbf{X}_{:m}|b_m = 1; G, \pi)$ . To be self-contained, we first briefly summarize the method in [4]:

- We discretize the hyper-parameter space of the imaging part of the model, *i.e.*,  $\pi' := \{\log_{10} \alpha, \sigma_0^2, \sigma_\omega^2\} \subset \pi$  into uniform grids, namely  $[\alpha(\min), \alpha(\max)] \times [\sigma_0^2(\min), \sigma_0^2(\max)] \times [\sigma_\omega^2(\min), \sigma_\omega^2(\max)]$ . Let us call the grid points  $\pi'(1), \dots, \pi'(L)$ , where every tuple  $\pi' = (\alpha(i), \sigma_0^2(i), \sigma_\omega^2(i))$  is a set of hyper-parameter values.
- Since the space of the hyper-parameters is low dimensional, importance sampling is a simple and effective way to integrate out the hyper-priors with a reasonably small number of samples. The proposal distribution is

chosen to be a uniform distribution over a sufficiently large range, *i.e.*,  $\tilde{p}(\pi'(i)) = \tilde{p}(\pi'(1))$ , where  $\tilde{p}(\cdot)$  is the proposal distribution.

- Given a set of hyper-parameter values  $\pi'(i)$ , a mean-field approach is used to approximate the marginal likelihood,  $p(\mathbf{x}_m|b_m = 1; G, \pi')$ , via the variational lower bound. Briefly, the mean-field method maximizes the following objective function:

$$\begin{aligned} & \log p(\mathbf{x}|b = 1; \mathbf{G}, \pi') \\ & \geq F(\pi'; \boldsymbol{\zeta}, \boldsymbol{\nu}, \boldsymbol{\tau}) \equiv \mathbb{E}_q \left[ \log \frac{p(\mathbf{x}, \boldsymbol{\omega}, \mathbf{a}|\mathbf{G}, \pi')}{q(\boldsymbol{\zeta}, \boldsymbol{\nu}, \boldsymbol{\tau})} \right] \\ & = -N \log(\sigma_0) - \frac{\|\mathbf{x} - \mathbf{G}\mathbf{r}\|^2}{2\sigma_0^2} \\ & \quad - \frac{1}{2\sigma_0^2} \sum_{k=1}^S (\mathbf{G}^T \mathbf{G})_{kk} \text{Var}_q[\omega_k] \\ & \quad - \sum_{k=1}^S \tau_k \log\left(\frac{\tau_k}{\alpha}\right) - \sum_{k=1}^S (1 - \tau_k) \log\left(\frac{1 - \tau_k}{1 - \alpha}\right) \\ & \quad + \sum_{k=1}^S \frac{\tau_k}{2} \left[ 1 + \log\left(\frac{\zeta_k^2}{\sigma_0^2 \sigma_\omega^2}\right) - \frac{\zeta_k^2 + \nu_k^2}{\sigma_0^2 \sigma_\omega^2} \right] \quad (2) \end{aligned}$$

where  $\boldsymbol{\zeta}, \boldsymbol{\nu}, \boldsymbol{\tau}$  are the parameters of the approximate posterior,  $q$  and  $\mathbf{r} := \mathbb{E}[\boldsymbol{\omega}_q] = \boldsymbol{\tau} \odot \boldsymbol{\nu}$  and  $\text{Var}_q[\omega_k] = \tau_k(\zeta_k^2 + \nu_k^2) - (\tau_k \nu_k)^2$ .

- Finally, the importance weights,  $\zeta(i)$ 's, are normalized. For each of  $\boldsymbol{\zeta}, \boldsymbol{\nu}, \boldsymbol{\tau}$ , a weighted sum over all  $\pi'(i)$  is computed as an approximation to integrating out the hyper-parameters.

This procedure needs to be run for every brain region. The pseudo-code of the algorithm is shown in Algorithm 2 [4].

To integrate out the hyper-priors, the main idea in [4] is to use importance sampling to compute the following integral:

$$\text{PIP}(s, m) = \int p(a_{sm} = 1 | \mathbf{G}, \mathbf{x}_m, \pi') p(\pi' | \mathbf{G}, \mathbf{x}_m) d\pi', \quad (3)$$

where  $\text{PIP}(s, m)$  denotes the Posterior Inclusion Probability for SNP  $s$  and region  $m$ . Carbonetto *et al.* [4] suggest to replace it with the following importance sampling estimate

$$\text{PIP}(s, m) = \frac{\sum_{i=1}^L p(a_{sm} = 1 | \mathbf{G}, \mathbf{x}_m, \pi'(i)) \zeta(\pi'(i))}{\sum_{i=1}^L \zeta(\pi'(i))} \quad (4)$$

where  $\zeta(\pi'(i))$  is the normalized importance weight for  $\pi'(i)$ . According to the importance sampling procedure,

$$\zeta(\pi') = \frac{p(\mathbf{x}_m | \mathbf{G}, \pi') p(\pi')}{\tilde{p}(\pi')}, \quad (5)$$

\* Data used in preparation of this article were obtained from the Alzheimer's Disease Neuroimaging Initiative (ADNI) database (adni.loni.usc.edu). As such, the investigators within the ADNI contributed to the design and implementation of ADNI and/or provided data but did not participate in analysis or writing of this report. A complete listing of ADNI investigators can be found at: [http://adni.loni.usc.edu/wp-content/uploads/how\\_to\\_apply/ADNI\\_Acknowledgement\\_List.pdf](http://adni.loni.usc.edu/wp-content/uploads/how_to_apply/ADNI_Acknowledgement_List.pdf)

\*\* Copyright (c) 2015 IEEE. Personal use of this material is permitted. However, permission to use this material for any other purposes must be obtained from the IEEE by sending a request to [pubs-permissions@ieee.org](mailto:pubs-permissions@ieee.org).

| SNP         | Gene                | SNP         | Gene             | SNP        | Gene            | SNP        | Gene                |
|-------------|---------------------|-------------|------------------|------------|-----------------|------------|---------------------|
| rs10106827  | NECAB1, TMEM55A     | rs12476069  | COL6A3, MLPH     | rs9393059  | FOXQ1, HUS1B    | rs71327107 | EP300, RBX1         |
| rs10487075  | C7orf62, STEAP2-AS1 | rs12535226  | EGFR, LANCL2     | rs2906657  | PILRA, ZCWPW1   | rs74322721 | DDHD1, FERMT2       |
| rs10504488  | EYA1, XKR9          | rs12778247  | ANXA8, ZNF488    | rs293168   | NDUFA4, NXP1    | rs75340942 | HABP2, TCF7L2       |
| rs10812555  | C9orf11, LINC00032  | rs12997264  | ATG16L1, INPP5D  | rs34380708 | KIAA0317, LTBP2 | rs7536931  | CR1, CR1L           |
| rs111863968 | ATG16L1, INPP5D     | rs13040601  | CBLN4, DOK5      | rs3764648  | ABCA7, HMHA1    | rs76222305 | LRRTM1, SUCLG1      |
| rs113814152 | CHRNA2, PTK2B       | rs13138250  | FGFRL1, IDUA     | rs3779632  | CHRNA2, PTK2B   | rs76448372 | AMICA1, SCN2B       |
| rs114773661 | CRBN, SUMF1         | rs13314819  | BBX, CCDC54      | rs4133300  | KCNJ3, NR4A2    | rs76822114 | GC, SLC4A4          |
| rs114956101 | KCNK17, KCNK5       | rs145767144 | MAF, WWOX        | rs4916928  | ., FAM20C       | rs76978231 | CSMD1, MCPH1        |
| rs115815527 | ASB5, SPCS3         | rs146373627 | ECHDC3, USP6NL   | rs56034708 | CDC7, TGFBR3    | rs77271157 | CLU, EPHX2          |
| rs11662059  | ACAA2, LIPG         | rs146643250 | DNAH5, TRIO      | rs57677986 | ADAM10, FAM63B  | rs77287774 | ZEB1-AS1, ZNF438    |
| rs117119586 | MTDH, TSPYL5        | rs147030865 | ATP8B4, SLC27A2  | rs59776273 | CORIN, NFXL1    | rs7812465  | PLEKHF2, TP53INP1   |
| rs117281307 | CTTNBP2, NAA38      | rs16849237  | RHO, TMEM78      | rs6020063  | B4GALT5, SLC9A8 | rs78180796 | PTPRM, RAB12        |
| rs117547283 | POM121L1, PRAME     | rs17108960  | CBX5, SMUG1      | rs622354   | OR10G7, VWA5A   | rs79079416 | CSNK1G1, KIAA0101   |
| rs117655211 | ATP8B4, DTWD1       | rs17781348  | GAK, TMEM175     | rs62389386 | CLK4, COL23A1   | rs792806   | CA10, KIF2B         |
| rs1178036   | GNRH2, PTPRA        | rs1806522   | C3orf27, RPN1    | rs6571632  | EGLN3, SPTSSA   | rs8030340  | RSL24D1, UNC13C     |
| rs117984432 | ANKRD11, SPG7       | rs1834554   | MS4A4A, MS4A4E   | rs6685242  | CD46, CR1L      | rs8707     | MAP3K12, PCB2       |
| rs118091716 | GRM3, SEMA3D        | rs1912718   | ATO1, GRID2      | rs6934812  | CD2AP, TNFRSF21 | rs2824734  | LINC00320, TMPRSS15 |
| rs118192075 | IMPACT, OSBPL1A     | rs2048330   | LINC00210, RRP15 | rs6949677  | C7orf70, CYTH3  | rs28592859 | HLA-DQA1, HLA-DQB1  |
| rs11875667  | CETN1, COLEC12      | rs2048330   | LINC00210, RRP15 | rs7027316  | IFNE, MTAP      | ε3/ε4      | APOE                |
| rs12002176  | C9orf170, DAPK1     | rs2136987   | CCKAR, RBPJ      | rs7068614  | ECHDC3, USP6NL  |            |                     |
| rs12137076  | GNG4, LYST          | rs2701623   | DTX1, RASAL1     | rs7087150  | CCNY, GJD4      |            |                     |
| rs12198405  | CD2AP, TNFRSF21     | rs79914380  | LMO3, MGST1      | rs7129687  | EED, PICALM     |            |                     |

TABLE II: Detected SNPs and the corresponding genes.

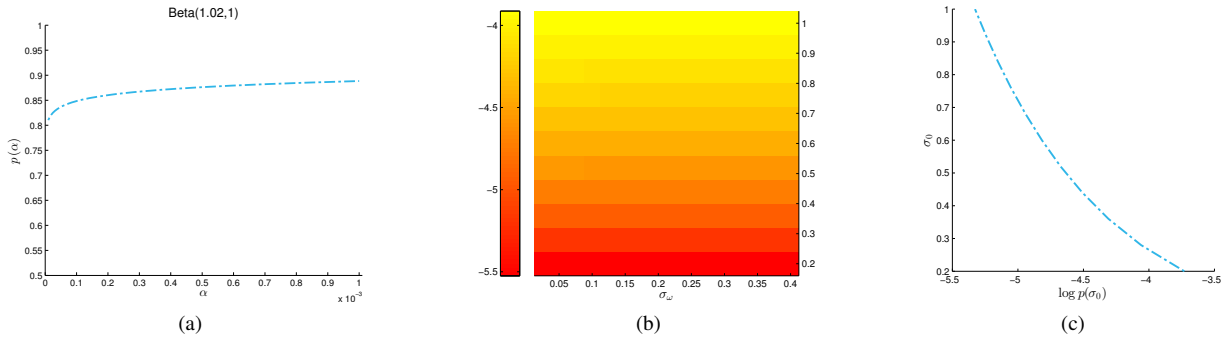

Fig. 1: Prior probability density for different hyper-parameters: (a) Density of  $\alpha$  for prior distribution of  $\text{Beta}(1.02, 1)$ . The prior assigns almost uniform weight to all values. (b)  $\log$  of  $PVE$  density as a function of  $\sigma_\omega$  ( $x$ -axis) and  $\sigma_0$  ( $y$ -axis).  $PVE$  functions as a prior for  $\sigma_\omega$  given a value of  $\sigma_0$ . (c)  $\log$  of the density of  $\sigma_0$ .

where the numerator is proportional to  $p(\pi' | \mathbf{x}_m, \mathbf{G})$  and the denominator is the proposal distribution, a uniform distribution in our experiments. Since the marginal likelihood  $p(\mathbf{x}_m | \mathbf{G}, \pi')$  cannot be computed directly, it is approximated by the highest lower bound:

$$\log p(\mathbf{x}_m | \mathbf{G}, \pi') \geq F(\pi'; \boldsymbol{\varsigma}, \boldsymbol{\nu}, \boldsymbol{\tau}). \quad (6)$$

To approximate the  $p(\mathbf{x}_m | \mathbf{G})$ , we can apply the following procedure:

$$\begin{aligned} p(\mathbf{x}_m | \mathbf{G}) &= \int p(\mathbf{x}_m, \pi' | \mathbf{G}) dp(\pi' | \mathbf{G}) = \mathbb{E}_{\pi' | \mathbf{G}} [p(\mathbf{x}_m, \pi' | \mathbf{G})] \\ &\geq \mathbb{E}_{\pi' | \mathbf{G}} \left[ e^{F(\pi'; \boldsymbol{\varsigma}, \boldsymbol{\nu}, \boldsymbol{\tau})} \right] \\ &\geq \exp \left[ \mathbb{E}_{\pi' | \mathbf{G}} [F(\pi'; \boldsymbol{\varsigma}, \boldsymbol{\nu}, \boldsymbol{\tau})] \right], \end{aligned} \quad (7)$$

where the last line in Eq. (7) follows from the convexity of exponential function.

Similar to Eq. (4), the idea is to replace the expectation with the importance sampling approximation:

$$\mathbb{E}_{\pi' | \mathbf{G}} [F(\pi'; \boldsymbol{\varsigma}, \boldsymbol{\nu}, \boldsymbol{\tau})] \approx \frac{\sum_{i=1}^L F(\pi'(i); \boldsymbol{\varsigma}, \boldsymbol{\nu}, \boldsymbol{\tau}) \zeta(\pi'(i))}{\sum_{i=1}^L \zeta(\pi'(i))}. \quad (8)$$

## REFERENCES

- [1] M. Beal and Z. Ghahramani, "The variational Bayesian EM algorithm for incomplete data: with application to scoring graphical model structures," *Bayesian Statistics*, vol. 7, pp. 1–10, 2003.
- [2] R. B. Grosse, "Model selection in compositional spaces," Ph.D. dissertation, Massachusetts Institute of Technology, 2014.
- [3] C. Ji, H. Shen, and M. West, "Bounded approximations for marginal likelihoods," 2010.
- [4] P. Carbonetto and M. Stephens, "Scalable Variational Inference for Bayesian Variable Selection in Regression, and its Accuracy in Genetic Association Studies," *Bayesian Analysis*, vol. 7, pp. 73–108, 2012.

---

**Algorithm 1:** Variational Learning to Approximate Posterior Relevance of Brain Regions

---

**Parameters:** (a) prior for the regions  $\alpha$ , (b) number of iterations:  $T$

**Data:** (a) Diagnosis  $\mathbf{y}$ , (b) Imaging Data  $\mathbf{X}$ , (c) Genotype  $\mathbf{G}$

**Output:** Parameters of the posterior distribution:  $\theta$

```

1 Approximate Bayes Factors ( $\gamma$ )
2   for  $m \leftarrow 1$  to  $M$  do
3     Set  $\gamma_m$  to an approximation of Eq. (1) (see Algorithm 2)
4 for  $i \leftarrow 1$  to  $T$  do
5   Draw a set from the current estimate of the posterior distribution:  $\mathbf{b}^t \sim q_{\tilde{\theta}^t}$ ;
6   Approximate the marginal conditional likelihood  $p(\mathbf{y}|\mathbf{b}^t; \mathbf{X}, \pi)$ ;
7   Set  $\hat{\mathbf{g}}^t = \tilde{\mathbf{b}}^t (\log p(\mathbf{y}|\mathbf{b}^t) + \gamma^T \mathbf{b}^t + |\mathbf{b}^t| \log \alpha)$ ;
8   Set  $\hat{\mathbf{C}}^t = \tilde{\mathbf{b}}^t (\tilde{\mathbf{b}}^t)^T$ ;
9   Set  $\mathbf{g}^{t+1} = (1-w)\mathbf{g}^t + w\hat{\mathbf{g}}^t$ ;
10  Set  $\mathbf{C}^{t+1} = (1-w)\mathbf{C}^t + w\hat{\mathbf{C}}^t$ ;
11  Solve  $\mathbf{C}^{t+1}\tilde{\theta}_{t+1} = \mathbf{g}^{t+1}$ ;
12  if  $t > N/2$  then
13    Set  $\bar{\mathbf{g}} = \bar{\mathbf{g}} + \hat{\mathbf{g}}^t$ ;
14    Set  $\bar{\mathbf{C}} = \bar{\mathbf{C}} + \hat{\mathbf{C}}^t$ ;
15 return the solution of a linear system of equations  $\bar{\mathbf{C}}\theta = \bar{\mathbf{g}}$ ;

```

---



---

**Algorithm 2:** Variational Learning to Approximate  $p(\mathbf{x}|b=1; \mathbf{G})$

---

**Data:** (a) Imaging features for one region  $\mathbf{x}$ , (b) Genotype  $\mathbf{G}$

**Parameters:** Set of hyper-parameters,  $\pi'(1), \dots, \pi'(L)$

```

1 Output
2   (a) Approximate marginal likelihood  $\hat{\gamma} \approx \log p(\mathbf{x}|b=1; \mathbf{G})$ ;
3   (b) Variational estimate of posterior inclusion probability  $\hat{\tau}_s := \mathbb{E}_q[a_s|\mathbf{x}, b=1; \mathbf{G}]$ ,  $\forall 1 \leq s \leq S$ ;
4   (c) Variational estimate of posterior variance ( $\hat{\varsigma} := \mathbb{E}_q[\omega|\mathbf{x}, b=1; \mathbf{G}]$ );
5   (d) Variational estimate of posterior variance ( $\hat{\nu} := \text{Var}_q[\omega|\mathbf{x}, b=1; \mathbf{G}]$ );
6 for  $i \leftarrow 1$  to  $L$  do
7   Initialize  $(\varsigma_{\text{Init}}, \nu_{\text{Init}}, \tau_{\text{Init}})$  randomly;
8    $(\varsigma(i), \nu(i), \tau(i), Z(i)) \leftarrow \text{Mean-Field}(\mathbf{G}, \mathbf{x}, \pi'(i))$ ;
9   Set  $(\varsigma_{\text{Init}}, \nu_{\text{Init}}, \tau_{\text{Init}})$  to the parameters associated with highest  $Z$ ;
10 for  $i \leftarrow 1$  to  $L$  do
11    $(\varsigma(i), \nu(i), \tau(i), Z(i)) \leftarrow \text{Mean-Field}(\mathbf{G}, \mathbf{x}, \pi'(i))$ ;
12   Compute importance weight  $\zeta(i) \leftarrow Z(i)p(\pi'(i))/\tilde{p}(\pi'(i))$ ;
13 Normalize importance weights:  $\zeta(i) \leftarrow \zeta(i)/(\sum_i \zeta(i))$ ;
14 Average Over Hyper-parameters
15    $\hat{\nu} \leftarrow \sum_{i=1}^L \zeta(i)\nu(i)$ ;
16    $\hat{\varsigma} \leftarrow \sum_{i=1}^L \zeta(i)\varsigma(i)$ ;
17    $\hat{\tau} \leftarrow \sum_{i=1}^L \zeta(i)\tau(i)$ ;
18    $\hat{\gamma} \leftarrow \sum_{i=1}^L \zeta(i) (\log Z(i))$ ;
19 return  $(\hat{\nu}, \hat{\varsigma}, \hat{\tau}, \hat{\gamma})$ ;
20
21 Mean-Field Subroutine
   Input: (a) Genotype ( $\mathbf{G}$ ), (b) Response ( $\mathbf{y}$ ), (c) Hyper-parameters ( $\pi'$ )
22    $(\varsigma, \nu, \tau) \leftarrow (\varsigma_{\text{Init}}, \nu_{\text{Init}}, \tau_{\text{Init}})$ ;
23   repeat
24     Choose  $s \in \{1, \dots, S\}$ ;
25      $\varsigma_s^2 \leftarrow \sigma_0^{-2} ((\mathbf{G}^T \mathbf{G})_{ss} + 1/\sigma_\omega^2)$ ;
26      $\nu_s \leftarrow \varsigma_s^2 \sigma_0^{-2} ((\mathbf{G}^T \mathbf{y})_s - \sum_{j \neq s} (\mathbf{G}^T \mathbf{G})_{js} \tau_j \nu_j)$ ;
27      $\frac{\tau_s}{1-\tau_s} \leftarrow \frac{\alpha}{1-\alpha} \times \frac{\varsigma_s}{\sigma_0 \sigma_\omega} \times \exp(\frac{1}{2} \nu_s^2 / \varsigma_s^2)$ ;
28   until Convergence;
29   Set  $\log Z$  to the approximate lower bound by Eq. (2);
30   return  $\varsigma, \nu, \tau, Z$ ;

```

---
